# Supplementary material for: Tracheostomy Timing and Outcome in Severe COVID-19: The WeanTrach Multicenter Study
Source: MDPI journal article supplement (doi:10.3390/jcm10122651), 2021-06-16
Supplement: s1 [file s1]

## **Supplemental Material (SM)**

### **Tracheostomy timing and outcome: the WeanTrach multicenter study**

#### **SM contents:**

**List of participating centers** [p. 2].

**Table S1.** Baseline characteristics of patients at ICU admission stratified for timing and type of tracheostomy. [p. 3, 4]

**Table S2.** Treatment characteristics of COVID-19 patients. [p. 5].

**Table S3.** Characteristics of ventilatory management on days 1, 7, 15 from ICU admission until the day of tracheostomy. [p. 6].

**Figure S1.** Cumulative survival of critically ill COVID-19 patients after tracheostomy. [p. 7]

**Table S4.** Timing and cause of death COVID-19 patients. [p. 8]

**Figure S2.** Cumulative survival after receiving percutaneous tracheostomy (early vs late) [p. 9]

**Figure S3.** Cumulative survival after receiving surgical tracheostomy (early vs late) [p. 9]

**Table S5.** Pathogens identified in bronchoalveolar lavage fluid before and after tracheostomy. [p. 10]

### **List of participating centers**

Anesthesia and Intensive Care, Policlinico San Martino Hospital, IRCCS for Oncology and Neuroscience, Genoa, Italy (coordinating center); Department of Otorhinolaryngology-Head and Neck Surgery, University of Genoa, San Martino Policlinico Hospital IRCCS for Oncology and Neuroscience, Genoa, Italy; Department of Otorhinolaryngology-Head and Neck Surgery, University of Brescia, ASST-Spedali Civili of Brescia, Brescia, Italy; First Division of Anesthesiology and Intensive Care Unit, ASST Spedali Civili di Brescia, 25123, Brescia Italy; Dipartimento dell'Emergenza e Trapianti d'Organo (DETO), Sezione di Anestesiologia e Rianimazione, Università degli Studi di Bari "Aldo Moro", Ospedale Policlinico, Bari, Italy; Anaesthesia and Intensive Care Department, University Hospital, Ospedale di Circolo, Varese, Italy; Anestesia e Rianimazione 1U, Department of Anesthesia, Intensive Care and Emergency, Città della Salute e della Scienza Hospital, Turin, Italy; Department of Anaesthesia, Intensive Care and Pain Management, Università Campus Bio-Medico di Roma, via Alvaro del Portillo 21, Rome, Italy; U.O. di Anestesia e Rianimazione, Ospedale di Treviglio-Caravaggio, Treviglio, Italy; Department of Morphology, Surgery and Experimental medicine, Faculty of Medicine, University of Ferrara, Ferrara, Italy; Anestesia e Rianimazione, Ospedale Villa Scassi, Genoa, Italy; Anesthesia and Intensive Care, "Garibaldi Centro" Hospital, ARNAS Garibaldi, Catania, Italy; Dipartimento di Neuroscienze, Scienze Riproduttive e Odontostomatologiche, Università degli Studi di Napoli Federico II, Napoli, Italy.

**Table S1. Baseline characteristics of patients at ICU admission stratified for timing and type of tracheostomy.**

| Baseline characteristics                              | Overall            | Time to tracheostomy |                    |         | Type of tracheostomy    |                    |         |
|-------------------------------------------------------|--------------------|----------------------|--------------------|---------|-------------------------|--------------------|---------|
|                                                       | N = 153            | Early<br>N = 76      | Late<br>N = 77     | P value | Percutaneous<br>N = 100 | Surgical<br>N = 53 | P value |
| <b>Patients directly admitted to ICU</b>              | 28 (18.3)          | 14 (18.4)            | 14 (18.2)          | 0.034   | 21 (21.0)               | 7 (13.2)           | 0.08    |
| <b>Endotracheal intubation</b>                        |                    |                      |                    |         |                         |                    |         |
| <i>Before ICU admission</i>                           | 18 (11.8)          | 4 (5.3)              | 14 (18.2)          |         | 8 (8.0)                 | 10 (18.9)          |         |
| <i>On the same day</i>                                | 124 (81.0)         | 67 (88.2)            | 57 (74.0)          |         | 86 (86.0)               | 38 (71.7)          |         |
| <i>During ICU stay</i>                                | 11 (7.2)           | 5 (6.6)              | 6 (7.8)            | 0.64    | 6 (6.0)                 | 5 (9.4)            | 0.59    |
| <b>ICU admission to endotracheal intubation, days</b> | N = 135            | N = 72               | N = 63             |         | N = 92                  | N = 43             |         |
|                                                       | 0.6 ± 3.18         | 0.9 ± 4.19           | 0.3 ± 1.16         |         | 0.7 ± 3.59              | 0.6 ± 2.05         |         |
|                                                       | 0.0 (0.0 – 31.0)   | 0.0 (0.0-31.0)       | 0.0 (0.0-7.0)      |         | 0.0 (0.0-31.0)          | 0.0 (0.0-10.0)     |         |
| <b>Type of respiratory support at ICU admission</b>   |                    |                      |                    | 0.09    |                         |                    | 0.22    |
| <i>COT (mild)</i>                                     | 12 (7.8)           | 5 (6.6)              | 7 (9.1)            | 0.39    | 6 (6.0)                 | 6 (11.3)           | 0.10    |
| <i>NIMV (moderate)</i>                                | 67 (43.8)          | 40 (52.6)            | 27 (35.1)          |         | 41 (41.0)               | 26 (49.1)          |         |
| <i>IMV (severe)</i>                                   | 74 (48.4)          | 31 (40.8)            | 43 (55.8)          |         | 53 (53.0)               | 21 (39.6)          |         |
| <b>Prone position</b>                                 | 93/151 (61.6)      | 43/74 (58.1)         | 50/77 (64.9)       |         | 65/98 (66.3)            | 28/53 (52.8)       |         |
| <b>Ventilation type</b>                               |                    |                      |                    | -       |                         |                    | -       |
| <i>COT (mild)</i>                                     | 1 (0.7)            | 1 (1.3)              | 0 (0.0)            | 0.05    | 0 (0.0)                 | 1 (1.9)            | 0.93    |
| <i>NIMV (moderate)</i>                                | 1 (0.7)            | 1 (1.3)              | 0 (0.0)            |         | 0 (0.0)                 | 1 (1.9)            |         |
| <i>IMV (PCV)</i>                                      | 57 (37.3)          | 17 (22.4)            | 40 (51.9)          |         | 36 (36.0)               | 21 (39.6)          |         |
| <i>IMV (VCV)</i>                                      | 46 (30.1)          | 19 (25.0)            | 27 (35.1)          |         | 22 (22.0)               | 24 (45.3)          |         |
| <i>IMV (AV)</i>                                       | 5 (3.3)            | 2 (2.6)              | 3 (3.9)            |         | 3 (3.0)                 | 2 (3.8)            |         |
| <i>Not reported</i>                                   | 43 (28.1)          | 36 (47.4)            | 7 (9.1)            |         | 39 (39.0)               | 4 (7.5)            |         |
| <b>Blood gas analysis</b>                             |                    |                      |                    |         |                         |                    |         |
| <i>PaO<sub>2</sub>/FiO<sub>2</sub></i>                | N = 107            | N = 38               | N = 69             | 0.05    | N = 58                  | N = 49             | 0.93    |
|                                                       | 155.4 ± 74.40      | 134.1 ± 55.39        | 167.2 ± 81.02      |         | 152.8 ± 70.05           | 158.5 ± 79.86      |         |
|                                                       | 138.3 (41.7-357.5) | 125.4 (53.0-323.3)   | 148.8 (41.7-357.5) |         | 140.4 (41.7-357.5)      | 130.0 (51.1-350.0) |         |

|                               |                                              |                                             |                                            |      |                                             |                                           |       |
|-------------------------------|----------------------------------------------|---------------------------------------------|--------------------------------------------|------|---------------------------------------------|-------------------------------------------|-------|
| <i>PaCO<sub>2</sub>, mmHg</i> | N = 107<br>46.5 ± 11.98<br>45.0 (22.0-100.0) | N = 38<br>46.7 ± 12.24<br>46.5 (22.0-100.0) | N = 69<br>46.3 ± 11.92<br>44.0 (28.0-83.8) | 0.56 | N = 58<br>48.1 ± 13.43<br>45.6 (28.0-100.0) | N = 49<br>44.6 ± 9.80<br>44.0 (22.0-83.0) | 0.27  |
| <b>IMV setting</b>            |                                              |                                             |                                            |      |                                             |                                           |       |
| <i>Minute volume, L/min</i>   | N = 106<br>9.0 ± 1.99<br>8.5 (2.8-15.0)      | N = 37<br>8.7 ± 2.04<br>8.4 (2.8-14.3)      | N = 69<br>9.1 ± 1.97<br>8.5 (6.0-15.0)     | 0.62 | N = 59<br>8.7 ± 1.96<br>8.4 (2.8-14.4)      | N = 47<br>9.4 ± 1.99<br>9.0 (5.6-15.0)    | 0.07  |
| <i>PEEP, cmH<sub>2</sub>O</i> | N = 108<br>12.0 ± 3.00<br>12.0 (5.0-20.0)    | N = 38<br>11.5 ± 2.90<br>12.0 (5.0-17.0)    | N = 70<br>12.3 ± 3.03<br>12.0 (6.0-20.0)   | 0.26 | N = 61<br>11.4 ± 2.81<br>12.0 (5.0-18.0)    | N = 47<br>12.7 ± 3.09<br>13.0 (7.0-20.0)  | 0.017 |
| <i>Tidal volume, ml/kg</i>    | N = 107<br>5.8 ± 1.06<br>5.9 (3.3-9.2)       | N = 38<br>5.7 ± .87<br>5.8 (4.1-7.9)        | N = 69<br>5.9 ± 1.16<br>6.0 (3.3-9.2)      | 0.40 | N = 60<br>5.7 ± 1.06<br>5.7 (3.3-9.2)       | N = 47<br>6.0 ± 1.07<br>6.0 (4.1-8.3)     | 0.13  |

Table Legend: ICU, intensive Care Unit; IMV, invasive mechanical ventilation; COT, conventional oxygen therapy; NIMV, non-invasive mechanical ventilation; PCV, pressure-controlled ventilation; VCV, volume-controlled ventilation; AV, assisted ventilation; PaO<sub>2</sub>, arterial partial pressure of oxygen; FiO<sub>2</sub>, fraction of inspired oxygen; PaCO<sub>2</sub>, partial pressure of carbon dioxide; PEEP, positive end-expiratory pressure. Data expressed as absolute number (percentage), mean ± standard deviation, or median (IQR) as appropriate. IQR: interquartile range.

**Table S2. Treatment characteristics of critically ill COVID-19 patients.**

| Treatment characteristics of COVID-19 patients (N = 153) |     |                 |
|----------------------------------------------------------|-----|-----------------|
| <b>Corticosteroids</b>                                   |     |                 |
|                                                          | No  | 32 (20.9)       |
|                                                          | Yes | 121 (79.1)      |
| <b>Tocilizumab</b>                                       |     |                 |
|                                                          | No  | 104 (69.3)      |
|                                                          | Yes | 46 (30.7)       |
| <b>Immunoglobulins</b>                                   |     |                 |
|                                                          | No  | 141 (93.4)      |
|                                                          | Yes | 10 (6.6)        |
| <b>Antivirals</b>                                        |     |                 |
|                                                          | No  | 33 (22.1)       |
|                                                          | Yes | 116 (77.9)      |
| <i>Antivirals used per patient, number</i>               |     | 1.6 ±1.2        |
|                                                          |     | 2.0 (0.0 - 5.0) |
| <i>Type of antiviral</i>                                 |     |                 |
| <i>Remdesivir</i>                                        | No  | 132 (88.6)      |
|                                                          | Yes | 17 (11.4)       |
| <i>Ritonavir</i>                                         | No  | 99 (66.4)       |
|                                                          | Yes | 50 (33.6)       |
| <i>Cobicistat</i>                                        | No  | 114 (76.5)      |
|                                                          | Yes | 35 (23.5)       |
| <i>Darunavir</i>                                         | No  | 85 (57.0)       |
|                                                          | Yes | 64 (43.0)       |
| <i>Hydroxychloroquine</i>                                | No  | 129 (86.6)      |
|                                                          | Yes | 20 (13.4)       |
| <i>Lopinavir</i>                                         | No  | 111 (74.5)      |
|                                                          | Yes | 38 (25.5)       |
| <i>Oseltamivir</i>                                       | No  | 137 (91.9)      |
|                                                          | Yes | 12 (8.1)        |

Table Legend: Data expressed as absolute number (percentage), mean ± standard deviation, or median (IQR) as appropriate. IQR: interquartile range.

**Table S3. Characteristics of ventilatory management on days 1, 7, 15 from ICU admission until the day of tracheostomy.**

| Ventilatory parameter                  | Day 1                | Day 7                | Day 15               | Day of tracheostomy* |
|----------------------------------------|----------------------|----------------------|----------------------|----------------------|
| <b>Ventilation type</b>                |                      |                      |                      |                      |
| <i>COT (mild)</i>                      | 1 (0.7)              | 9 (5.9)              | 2 (1.3)              | 0 (0.0)              |
| <i>NIMV (moderate)</i>                 | 1 (0.7)              | 4 (2.6)              | 2 (1.3)              | 0 (0.0)              |
| <i>IMV (severe)</i>                    |                      |                      |                      |                      |
| <i>PCV</i>                             | 57 (37.3)            | 32 (20.9)            | 47 (30.7)            | 34 (22.2)            |
| <i>VCV</i>                             | 46 (30.1)            | 19 (12.4)            | 22 (14.4)            | 21 (13.7)            |
| <i>AV</i>                              | 5 (3.3)              | 43 (28.1)            | 37 (24.2)            | 52 (34.0)            |
| <i>Not reported</i>                    | 43 (28.1)            | 46 (30.1)            | 43 (28.1)            | 42 (27.5)            |
| <b>Blood gas analysis</b>              |                      |                      |                      |                      |
| <i>PaO<sub>2</sub>/FiO<sub>2</sub></i> | N = 107              | N = 109              | N = 106              | N = 107              |
|                                        | 138.3 (41.7 - 357.5) | 162.0 (58.0 - 460.0) | 164.5 (56.0 - 500.0) | 168.0 (57.5 - 496.0) |
| <i>PaCO<sub>2</sub>, mmHg</i>          | N = 107              | N = 109              | N = 106              | N = 106              |
|                                        | 45.0 (22.0 - 100.0)  | 47.0 (27.0 - 137.0)  | 44.0 (29.0 - 79.0)   | 46.5 (30.0 - 72.0)   |
| <b>IMV setting</b>                     |                      |                      |                      |                      |
| <i>MV, L/min</i>                       | N = 106              | N = 89               | N = 68               | N = 71               |
|                                        | 8.5 (2.8 - 15.0)     | 9.0 (2.0 - 18.0)     | 9.5 (2.3 - 18.0)     | 9.4 (1.5 - 15.9)     |
| <i>PEEP, cmH<sub>2</sub>O</i>          | N = 108              | N = 106              | N = 97               | N = 107              |
|                                        | 12.0 (5.0 - 20.0)    | 10.0 (4.0 - 18.0)    | 10.0 (4.0 - 15.0)    | 10.0 (2.0 - 31.0)    |
| <i>Tidal volume, ml/kg</i>             | N = 107              | N = 88               | N = 68               | N = 71               |
|                                        | 5.9 (3.3 - 9.2)      | 5.9 (1.5 - 9.2)      | 5.9 (1.8 - 12.5)     | 5.8 (2.6 - 12.5)     |

Table Legend: ICU, intensive care unit; FiO<sub>2</sub>, fraction of inspired oxygen; PaO<sub>2</sub>, partial pressure of arterial oxygen; PaCO<sub>2</sub>, partial pressure of arterial carbon dioxide; COT, conventional oxygen therapy; NIMV, non-invasive mechanical ventilation; IMV, invasive mechanical ventilation; VCV, volume-controlled ventilation; PCV, pressure-controlled ventilation; AV, assisted ventilation; PEEP, positive end-expiratory pressure; MV, minute ventilation. Data are reported as median (IQR); number of patients (percentage) as appropriate. \* Day when tracheostomy performed.

Figure S1. Cumulative survival after tracheostomy in critically ill COVID-19 patients.

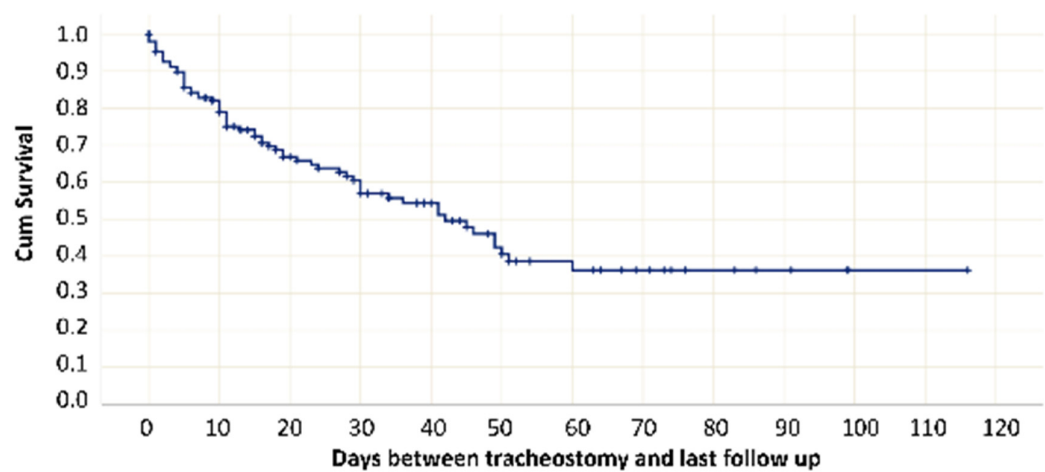

| Days of Follow Up | Events | Cum. prop. surv. [S.E.] |
|-------------------|--------|-------------------------|
| 10                | 30     | 0.790 (0.034)           |
| 20                | 44     | 0.668 (0.042)           |
| 30                | 53     | 0.570 (0.047)           |
| 40                | 55     | 0.544 (0.048)           |
| 50                | 63     | 0.405 (0.056)           |
| 60                | 65     | 0.362 (0.058)           |

**Table S4. Timing and cause of death in COVID-19 patients.**

| COVID-19 (N = 153)                      |                    |
|-----------------------------------------|--------------------|
| Death                                   | 65 (42.5)          |
| Days elapsed from tracheostomy to death | 25.4 ± 24.47       |
|                                         | 16.0 (0.0 – 116.0) |
| Cause of death                          |                    |
| <i>Cardiocirculatory arrest</i>         | 10 (15.4)          |
| <i>Respiratory failure</i>              | 6 (9.2)            |
| <i>Multiorgan dysfunction</i>           | 45 (69.2)          |
| <i>Pulmonary embolism</i>               | 2 (3.1)            |
| <i>Pancreatitis</i>                     | 1 (1.5)            |
| <i>Not available</i>                    | 1 (1.5)            |

Table Legend: ICU, intensive care unit. Data expressed as mean ± standard deviation, median (range), or number (percentage) as appropriate.



Figure S2. Cumulative survival after receiving percutaneous tracheostomy (early vs late)

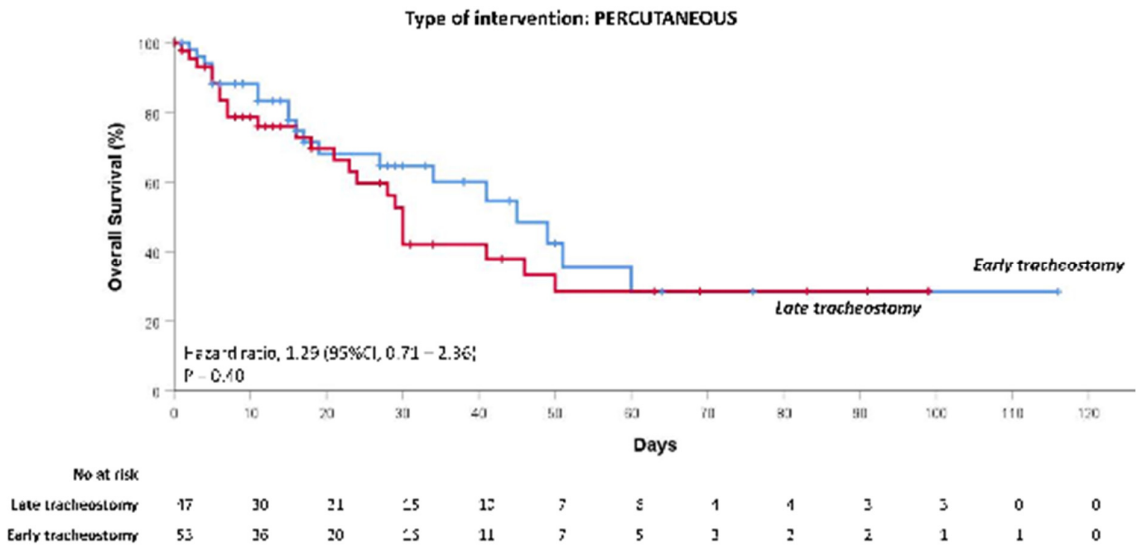

Figure S3. Cumulative survival after receiving surgical tracheostomy (early vs late)

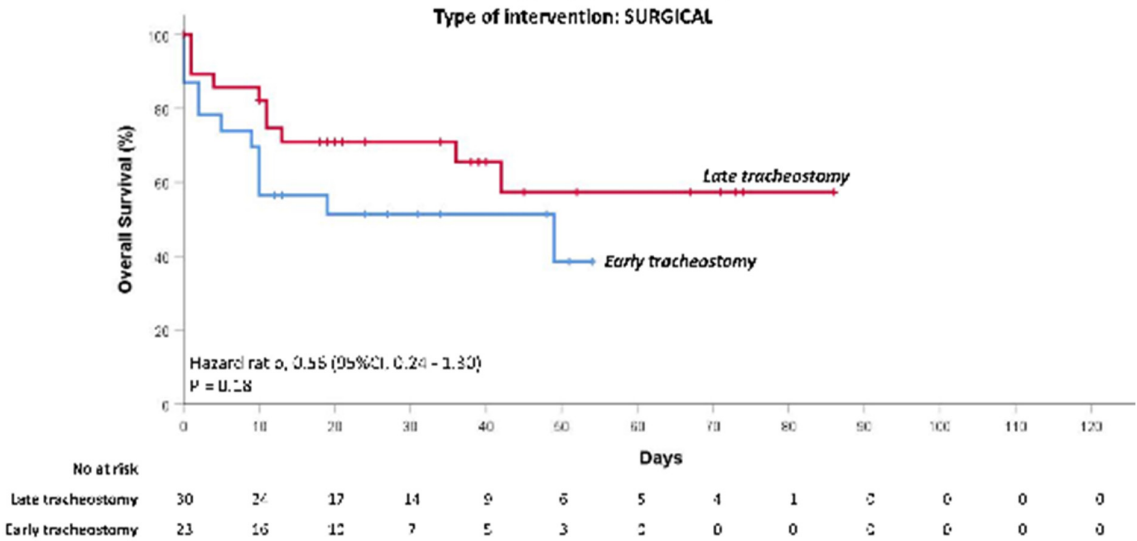

**Table S5. Pathogens identified in bronchoalveolar lavage fluid before and after tracheostomy.**

| Pathogens in BALF                                          | Pre-tracheostomy                                                                                                                                                                                                                                                                                                                                                                                                | Post-tracheostomy  |
|------------------------------------------------------------|-----------------------------------------------------------------------------------------------------------------------------------------------------------------------------------------------------------------------------------------------------------------------------------------------------------------------------------------------------------------------------------------------------------------|--------------------|
| <i>Patients with <math>\geq 2</math> pathogens in BALF</i> | 18 (11.8)                                                                                                                                                                                                                                                                                                                                                                                                       | 30 (19.6)          |
| <i>Patients without available BALF</i>                     | 84 (54.9)                                                                                                                                                                                                                                                                                                                                                                                                       | 66 (43.1)          |
| <i>Patients with negative BALF</i>                         | 19 (12.4)                                                                                                                                                                                                                                                                                                                                                                                                       | 17 (11.1)          |
| <i>Patients with positive BALF</i>                         | 50 (32.7)                                                                                                                                                                                                                                                                                                                                                                                                       | 70 (45.8)          |
| <i>Overall identified pathogens in BALF</i>                | 75 (100)                                                                                                                                                                                                                                                                                                                                                                                                        | 107 (100)          |
| <i>Type of pathogens identified in positive BALF</i>       | Pre-tracheostomy                                                                                                                                                                                                                                                                                                                                                                                                | Post- tracheostomy |
| <i>Pseudomonas aeruginosa</i>                              | 23 (30.7)                                                                                                                                                                                                                                                                                                                                                                                                       | 29 (27.1)          |
| <i>Klebsiella pneumoniae</i>                               | 10 (13.3)                                                                                                                                                                                                                                                                                                                                                                                                       | 13 (12.1)          |
| <i>Staphylococcus aureus</i>                               | 7 (9.3)                                                                                                                                                                                                                                                                                                                                                                                                         | 9 (8.4)            |
| <i>Candida albicans</i>                                    | 6 (8.0)                                                                                                                                                                                                                                                                                                                                                                                                         | 7 (6.5)            |
| <i>Acinetobacter baumannii</i>                             | 5 (6.7)                                                                                                                                                                                                                                                                                                                                                                                                         | 9 (8.4)            |
| <i>Stenotrophomonas maltophilia</i>                        | 4 (5.3)                                                                                                                                                                                                                                                                                                                                                                                                         | 4 (3.7)            |
| <i>Candida parapsilosis</i>                                | 3 (4.0)                                                                                                                                                                                                                                                                                                                                                                                                         | 3 (2.8)            |
| <i>Aspergillus fumigatus</i>                               | 1 (1.3)                                                                                                                                                                                                                                                                                                                                                                                                         | 7 (6.5)            |
| <i>Others</i>                                              | <i>C. glabrata, C. tropicalis, P. C. glabrata, C. tropicalis, C. mirabilis, A. pittii, A. fumigatus, auris, A. niger, A. pittii, E. E. aerogenes, E. cloacae, E. coli, aerogenes, E. faecalis, E. faecium, H. influenzae, O. anthropi, P. E. cloacae, E. coli, H. influenzae, fluorescens, R. ornithinolytica, O. anthropi, K. oxytoca, M. S. anginosus, S. hominis, S. morganii, S. epidermidis, P. putida</i> |                    |

Table Legend: BALF, bronchoalveolar lavage fluid. Data expressed as number (percentage).
